# Supplementary material for: Rare earth doped mesoporous hybrid thin films with tunable optical responses
Source: Royal Society of Chemistry journal article supplement (doi:10.1039/b702409f), 2007-01-01

## SUPPLEMENTARY INFORMATION

**Fig. S1** Optical micrograph showing the macroscopic homogeneity of a film.

**Fig. S2** Quinizarin emission spectra of CS14Q<sub>III</sub> films prepared with (before and after ethanol washing) and without CTAB surfactant ( $\lambda_{\text{exc}}=500\text{nm}$ ).

**Fig. S3** RBS measured and calculated spectra. Two peaks are observed, corresponding to light atoms (C,N,O) at 720 keV and to Eu atoms at 1790 keV.

**Fig. S4** Emission spectra of quinizarin in ethanol ( $10^{-4}\text{M}$ ) with one equivalent of europium acetylacetonate, nitrate or chloride ( $\lambda_{\text{exc}}=480\text{nm}$ ).

**Fig. S5** Infrared spectra of CS10Q<sub>I</sub> film (A) before ethanol washing (B) after ethanol washing and complexation of europium acetylacetonate.

## FIGURE S1

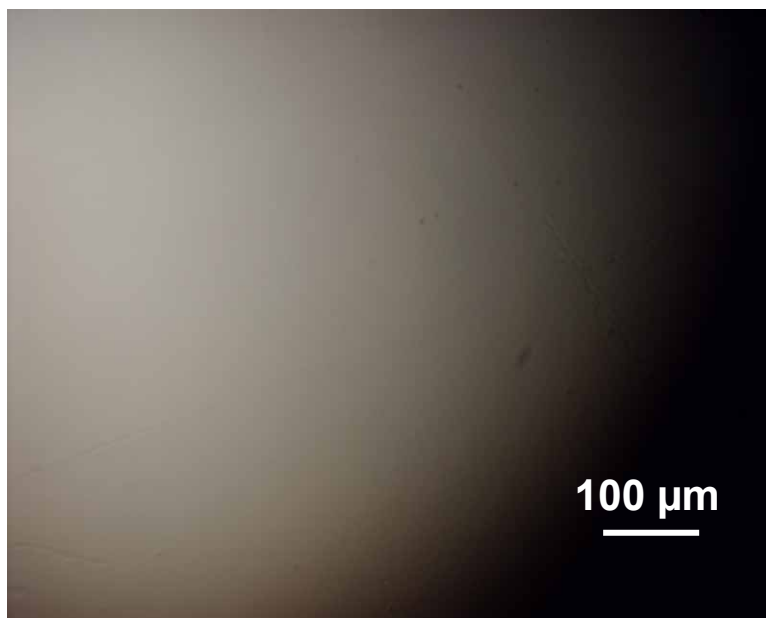

## FIGURE S2

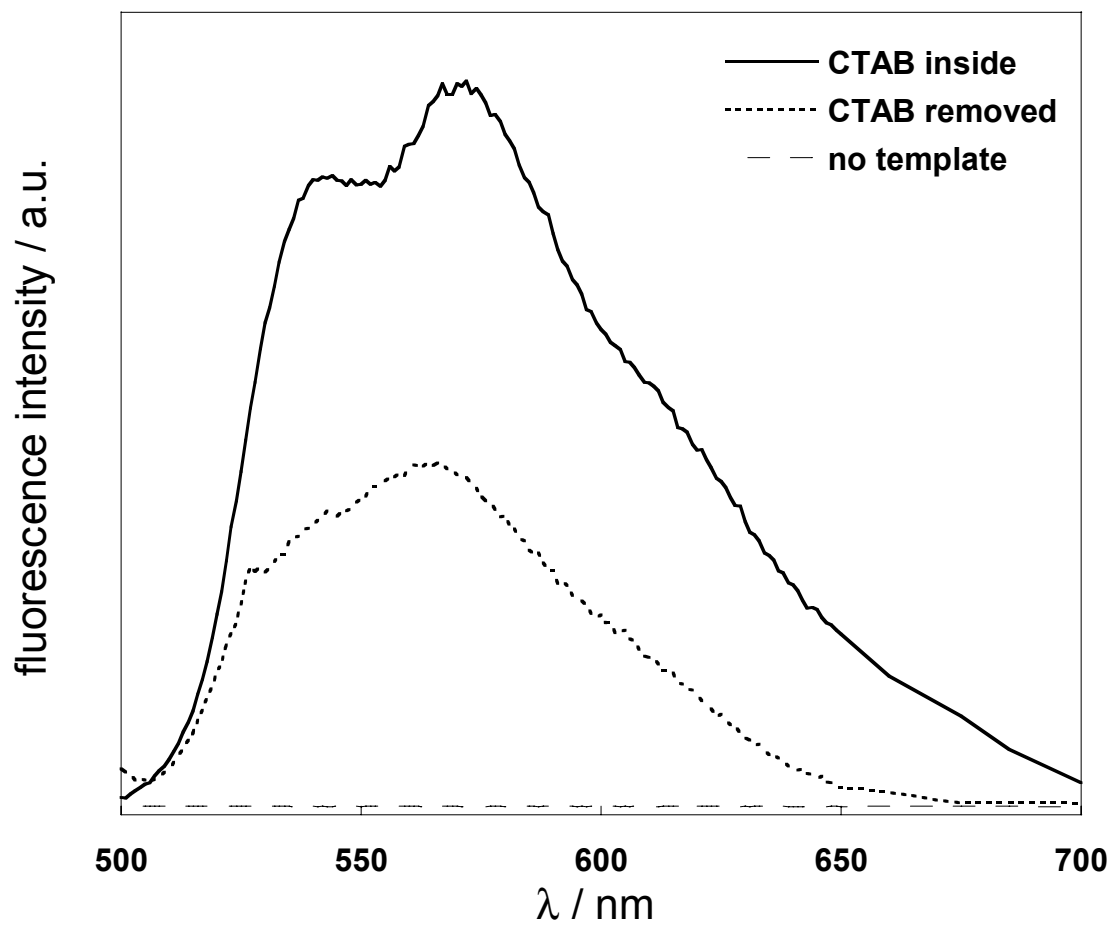

## FIGURE S3

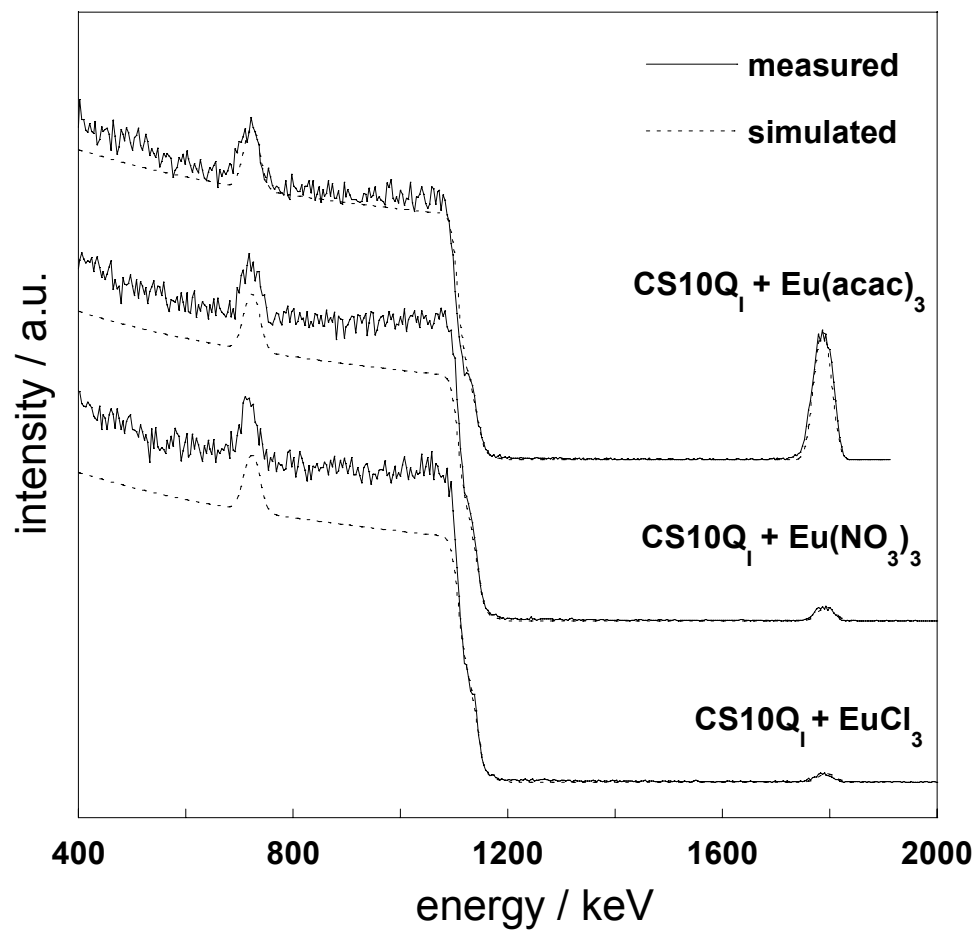

## FIGURE S4

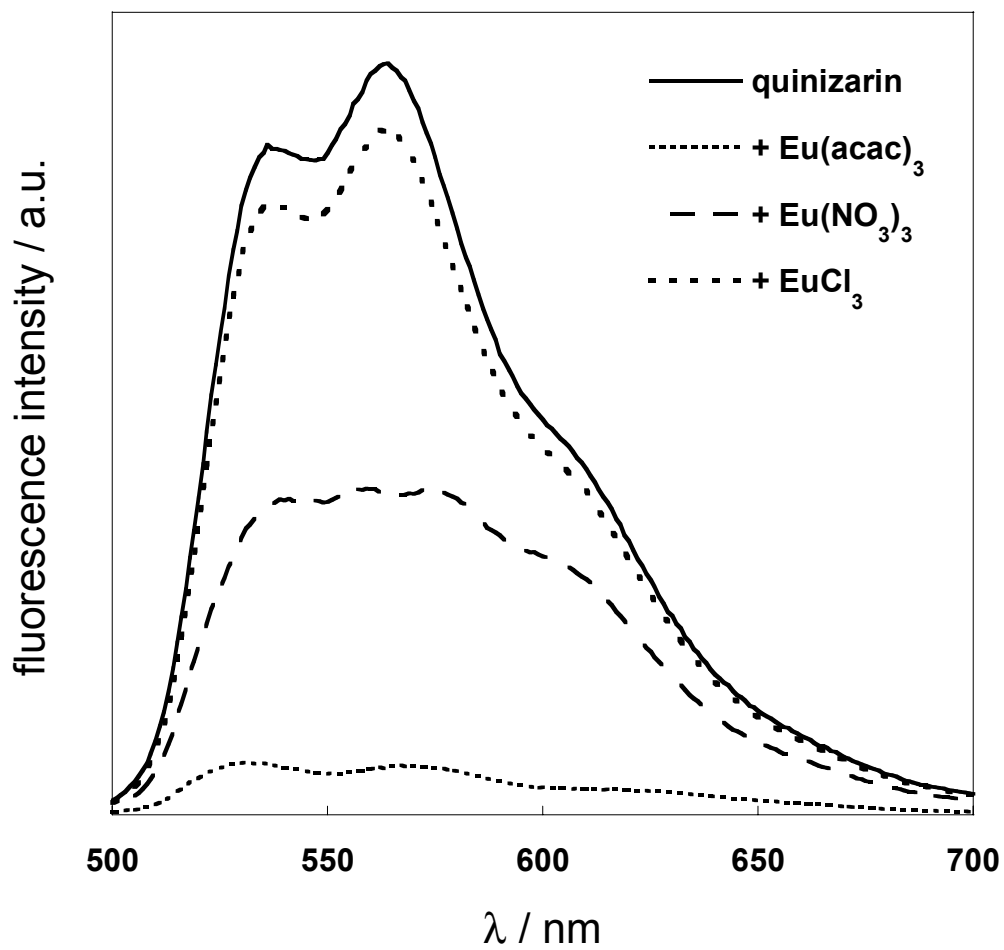

## FIGURE S5

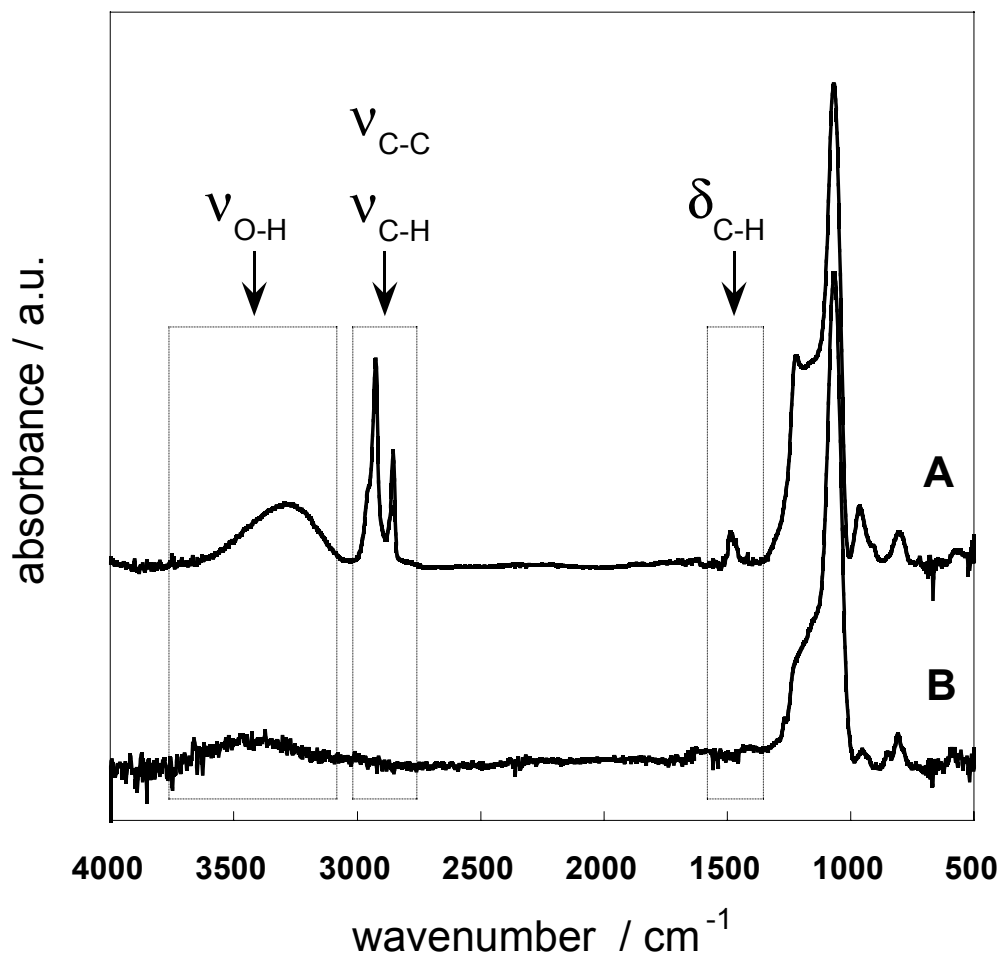

Supplement: b702409f.pdf [file b702409f.pdf]
